# Supplementary material for: Fullerenol changes metabolite responses differently depending on the iron status of cucumber plants
Source: PLoS One. 2021 May 17;16(5):e0251396. doi: 10.1371/journal.pone.0251396 (PMC8128279; doi:10.1371/journal.pone.0251396)
Supplement: S1 Table — (XLSX) [file pone.0251396.s001.xlsx]

## Sheet: Лист1
Table S1. Compound identification in the cucumber leaves grown hydroponically in a nutrient solution, either with (+FeII and +FeIII) or in Fe-free (−FeII and −FeIII) nutrient solution, with or without the supply of 0 (F0), 1 (F1) and 2 (F2) mg L-1 fullerenol for 10 days.
name	RI-RI(lib.)	match factor (0-100)
a-Amyrin	-7.5	86
Adipic acid	6.6	83
Alanine	-0.1	91
Allantoin	28.9	87
Altrose	-10.6	80
a-Methylglucoside	-4.4	89
Aminoadipic acid	14.2	88
Aminomalonic acid	-5	85
5-amino-valeric acid	7.9	82
Arabitol	-1.7	88
Aspartic acid (2TMS)	-8.2	89
Aspartic acid (3TMS)	-5.6	90
Asparagine	-14.2	88
a-Tocopherol	-7.7	82
b-Alanine	11.7	81
Caffeic acid	10.3	81
Cholesterol	2	81
Citramalic acid	-4	84
Citric acid	-11.6	82
Dehydroabietic acid	-3.8	88
Diethylenglycol	12.4	91
Erythronic acid	-8.6	86
Ethanolamine	1.6	91
FA_10:0*	1	82
FA_12:0	-8.8	83
FA_14:0	-43.3	77
FA_15:0	-17.7	87
FA_16:0	-3.9	91
FA_16:1 (9Z)	-23.6	80
FA_17:0	0.4	84
FA_18:0	-3.4	88
FA_18:2 (9,12 ZZ)	-18.5	80
FA_18:3 (9,12,15 ZZZ)	-6.3	92
FA_24:0	-5.4	78
FA_6:0	11.7	80
FA_7:0	7.3	82
FA_8:0	2.8	85
FA_9:0	-6.2	84
Ferulic acid	-13.6	80
Fructose (aF)	-16.7	88
Fructose (bF)	-17.1	80
Fumaric acid	-7.2	92
GABA (2TMS)	-4.5	80
GABA (3TMS)	0.8	92
Galactinol (4-1)	6.3	75
Galactinol (4-2)	-8.8	89
Galactinol (4-3)	-5.9	90
Galactinol (4-4)	1.2	89
Galactose	-9.4	80
Gluconic acid	-7.4	81
Glucose (aP)	-6.6	88
Glucose (bP)	-2.2	90
Glutamic acid	-8.7	88
Glutamine	-11	83
Glutaric acid	4.3	84
Glyceric acid	-15	90
Glycerol	-1.7	91
Glycerol-3-phosphate	-9.3	87
Glycine (2TMS)	0.2	92
Glycine (3TMS)	-3.6	86
Glycolic acid	0.5	95
g-tocopherol	-11	78
Hydracrylic acid	-0.4	87
2-Hydroxyadipic acid	15.5	75
3-hydroxypyridine	-2.5	88
2-hydroxy-pyridine	6	87
Isoleucine	-2.3	85
2-Isopropylmalic acid	19.2	80
2-Ketoglutaric acid	-12.3	83
Lactic acid	2.5	93
Levulinic acid	9.6	85
Lyxose	-8.2	81
MAG[0/16:0/0]**	-10.7	86
MAG[0/18:0/0]	-13	85
MAG[16:0/0/0]	-8.9	88
MAG[18:0/0/0]	-11.1	88
Maleic acid	-8.9	83
Malic acid	-2.2	89
Malonic acid	-9	82
Mannose	-7	84
Me-FA_18:0***	-8.9	91
Me-FA_18:2	-5.3	87
Me-FA_18:3	-4.8	90
Methyl ethyl malonate	-80	84
Methyl glycerate	-4.5	91
Methyl phosphate	-5.8	84
myo-Inositol	4.6	89
myo-inositol-2-phosphate	-2.9	84
N-acetylserine	-5.5	82
Neophytadiene	-0.2	91
Ornithine	-7.9	85
Ornithine lactam	7.6	87
Oxalate	-5.1	90
Oxoproline	-3.5	90
Pantothenic acid	20.5	85
Phenylacetic acid	-9.6	91
Phosphoric acid	-7.3	86
Phytol	-1	90
Pipecolic acid	-1.3	91
Proline	-2.5	86
Putrescine	15	90
Pyroglutamic acid (1TMS)	-18.8	83
2-Pyrrolidinone	-3.8	81
Pyruvic acid	1.6	91
Rhamnose	-10.2	80
Ribose	-19.8	86
Serine (2 TMS)	-3.2	87
Serine (3 TMS)	-5.4	91
Shikimic acid	-13.8	85
Succinic acid	-10.5	90
Sucrose	-7.1	84
Threonic acid	-7.6	86
Threonine	-4.9	88
Threono-1,4-lactone	-7.2	79
Urea	-11.6	85
Valine (1TMS)	0.4	91
Valine (2 TMS)	-2	89
Xylose	-10.2	86
* Fatty acid
**Monoaacylglycerol
***Methyl ether of fatty acid
